# Supplementary material for: A Chinese alligator in heliox: formant frequencies in a crocodilian
Source: PubMed Central journal article supplement (PMC4528706; doi:10.1242/jeb.119552), 2015-08
Supplement: supp_218.15.2442_JEB119552supp.pdf [file supp_218.15.2442_JEB119552supp.pdf]

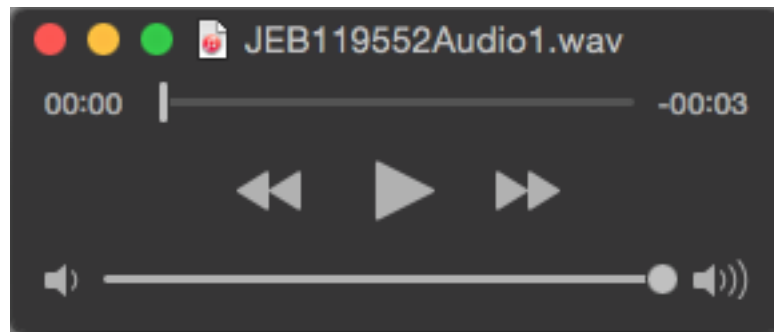

**Audio 1. Bellow recordings.** The sound file used to create the spectrogram in Fig. 1; two calls in ambient air are followed by two calls in heliox.
